# Supplementary material for: Specific knockdown of Htra2 by CRISPR-CasRx prevents acquired sensorineural hearing loss in mice
Source: PubMed Central journal article supplement — Mol Ther Nucleic Acids. 2022 Apr 26;28:643–55. doi: 10.1016/j.omtn.2022.04.014 (PMC9112053; doi:10.1016/j.omtn.2022.04.014), 2022-04-26
Supplement: mmc1.pdf [file mmc1.pdf]

OMTN, Volume 28

## Supplemental information

### **Specific knockdown of *Htra2* by CRISPR-CasRx prevents acquired sensorineural hearing loss in mice**

**Yang Guo, Lei Han, Shuang Han, Honghai Tang, Shengyi Wang, Chong Cui, Bing Chen, Huawei Li, and Yilai Shu**

## Supplementary information

### Supplemental text

**Guide-RNA expressing plasmid: gRNA sequences are colored in blue**

GCTAGCGAGGGCCTATTTCCCATGATTCTTCATATTTGCATATACGATACAA  
GGCTGTTAGAGAGATAATTGGAATTAATTTGACTGTAAACACAAAGATATTA  
GTACAAAATACGTGACGTAGAAAGTAATAATTTCTTGGGTAGTTTGCAGTTT  
TAAAATTATGTTTTAAAATGGACTATCATATGCTTACCGTAACTTGAAAGTAT  
TTCGATTTCTTGGCTTTATATATCTTGTGGAAAGGACGAAACACCGCAAGTA  
AACCCCTACCAACTGGTCGGGGTTTCAAAC**CCCACATTCAATCGTGCCAG**  
**AGATCCGGG**CAAGTAAACCCCTACCAACTGGTCGGGGTTTCAAACCTTTTTT  
TGAATTCTGATGCGGTATTTCTCCTTACGCATCTGTGCGGTATTTACACCG  
CATACGTCAAAGCAACCATAGTACGCGCCCTGTAGCGGCGCATTAAAGCGCG  
GCGGGTGTGGTGGTTACGCGCAGCGTGACCGCTACACTTGCCAGCGCCTTA  
GCGCCCGCTCCTTTCGCTTTCTTCCCTTCCCTTCTCGCCACGTTCCGCCGGCT  
TTCCCGTCAAGCTCTAAATCGGGGGCTCCCTTTAGGGTTCCGATTTAGTGC  
TTTACGGCACCTCGACCCCAAAAACTTGATTTGGGTGATGGTTCACGTAG  
TGGGCCATCGCCCTGATAGACGGTTTTTTCGCCCTTTGACGTTGGAGTCCAC  
GTTCTTTAATAGTGGACTCTTGTTCCAAACTGGAACAACACTCAACTCTATC  
TCGGGCTATTCTTTTGATTTATAAGGGATTTTGCCGATTTCCGGTCTATTGGTT  
AAAAAATGAGCTGATTTAACAAAAATTTAACGCGAATTTTAACAAAATATTA  
ACGTTTACAATTTTATGGTGC ACTCTCAGTACAATCTGCTCTGATGCCGCAT  
AGTTAAGCCAGCCCCGACACCCGCCAACACCCGCTGACGCGCCCTGACGG  
GCTTGTCTGCTCCCGGCATCCGCTTACAGACAAGCTGTGACCGTCTCCGGG  
AGCTGCATGTGTCAGAGGTTTTACCGTCATCACCGAAACGCGCGAGACG  
AAAGGGCCTCGTGATACGCCTATTTTTATAGGTTAATGTCATGATAATAATGG  
TTTCTTAGACGTCAGGTGGCACTTTTCGGGGAAATGTGCGCGGAACCCCTA  
TTTGTATTATTTTCTAAATACATTCAAATATGTATCCGCTCATGAGACAATAA  
CCCTGATAAATGCTTCAATAATATTGAAAAGGAAGAGTATGAGTATTCAAC  
ATTTCCGTGTCGCCCTTATTCCCTTTTTTGCGGCATTTTGCCTTCCTGTTTTT

GCTCACCCAGAAACGCTGGTGAAAGTAAAAGATGCTGAAGATCAGTTGGG  
TGCACGAGTGGGTTACATCGAACTGGATCTCAACAGCGGTAAGATCCTTGA  
GAGTTTTCGCCCCGAAGAACGTTTTCCAATGATGAGCACTTTTAAAGTTCT  
GCTATGTGGCGCGGTATTATCCCGTATTGACGCCGGGCAAGAGCAACTCGG  
TCGCCGCATACACTATTCTCAGAATGACTTGGTTGAGTACTCACCAGTCACA  
GAAAAGCATCTTACGGATGGCATGACAGTAAGAGAATTATGCAGTGCTGCC  
ATAACCATGAGTGATAACACTGCGGCCAACTTACTTCTGACAACGATCGGA  
GGACCGAAGGAGCTAACCGCTTTTTTGCACAACATGGGGGATCATGTA  
ACTCGCCTTGATCGTTGGGAACCGGAGCTGAATGAAGCCATACCAAACGACGA  
GCGTGACACCACGATGCCTGTAGCAATGGCAACAACGTTGCGCAA  
ACTATTAACTGGCGAACTACTTACTCTAGCTTCCCGGCAACAATTAATAGACTGGAT  
GGAGGCGGATAAAGTTGCAGGACCACTTCTGCGCTCGGCCCTTCCGGCTG  
GCTGGTTTATTGCTGATAAATCTGGAGCCGGTGAGCGTGGAAGCCGCGGTA  
TCATTGCAGCACTGGGGCCAGATGGTAAGCCCTCCCGTATCGTAGTTATCTA  
CACGACGGGGAGTCAGGCAACTATGGATGAACGAAATAGACAGATCGCTG  
AGATAGGTGCCTCACTGATTAAGCATTGGTAACTGTCAGACCAAGTTTACT  
CATATATACTTTAGATTGATTTAAA  
ACTTCATTTTTAATTTAAAAGGATCTAG  
GTGAAGATCCTTTTTGATAATCTCATGACCAA  
AATCCCTTAACGTGAGTTTT  
CGTTCCACTGAGCGTCAGACCCCGTAGAAA  
AGATCAAAGGATCTTCTTGAG  
ATCCTTTTTTTCTGCGCGTAATCTGCTGCTT  
GCAAACAAAAAACCACCGCT  
ACCAGCGGTGGTTTGTGGCCGATCAAGAGCT  
ACCAACTCTTTTTCCGAA  
GGTAACTGGCTTCAGCAGAGCGCAGATA  
CCAAATACTGTTCTTCTAGTGTA  
GCCGTAGTTAGGCCACCACTTCAAGAACT  
CTGTAGCACCGCCTACATACCT  
CGCTCTGCTAATCCTGTTACCAGTGGCT  
GCTGCCAGTGGCGATAAGTCGTG  
TCTTACCGGGTTGGACTCAAGACGATAGTT  
ACCGGATAAGGCGCAGCGGTC  
GGGCTGAACGGGGGGTTCGTGCACACAG  
CCCAGCTTGGAGCGAACGACCT  
ACACCGAACTGAGATACCTACAGCGTGAG  
CTATGAGAAAGCGCCACGCTT  
CCCGAAGGGAGAAAGGCGGACAGGTAT  
CCGGTAAGCGGCAGGGTCCGAA  
CAGGAGAGCGCACGAGGGAGCTTCCAG  
GGGAAACGCCTGGTATCTTTAT  
AGTCCTGTCGGGTTTCGCCACCTCTGACTT  
GAGCGTCGATTTTTGTGATGCT

CGTCAGGGGGGCGGAGCCTATGGAAAAACGCCAGCAACGCGGCCTTTTTC  
CGGTTCCCTGGCCTTTTGCTGGCCTTTTGCTCA

**RfxCas13d-mCherry plasmid: RfxCas13d and mCherry are colored in blue and red respectively**

GAACGCGCGGCGCACCGGGAAGCCCTCGCCCTCGAAACCGCTGGGCGCG  
GTGGTCACGGTGAGCACGGGACGTGCGACGGCGTCGGCGGGTGC GGATAC  
GCGGGGCAGCGTCAGCGGGTTCTCGACGGTCACGGCGGGCATGCGGCCGC  
ATAACTTACGGTAAATGGCCCGCCTGGCTGACCGCCCAACGACCCCCGCC  
ATTGACGTCAATAATGACGTATGTTCCCATAGTAACGCCAATAGGGACTTTC  
CATTGACGTCAATGGGTGGAGTATTTACGGTAAACTGCCACTTGGCAGTA  
CATCAAGTGTATCATATGCCAAGTACGCCCCCTATTGACGTCAATGACGGTA  
AATGGCCCGCCTGGCATTATGCCCAGTACATGACCTTATGGGACTTTCCTAC  
TTGGCAGTACATCTACGTATTAGTCATCGCTATTACCATGGTTCGAGGTGAGC  
CCCACGTTCTGCTTCACTCTCCCCATCTCCCCCCCCCTCCCCACCCCAATTT  
TGTATTTATTTATTTTTTAATTATTTTGTGCAGCGATGGGGGCGGGGGGGGG  
GGGGGGCGCGCGCCAGGCGGGGCGGGGCGGGGCGAGGGGCGGGGCGGG  
GCGAGGCGGAGAGGTGCGGCGGCAGCCAATCAGAGCGGCGCGCTCCGAA  
AGTTTCCTTTTATGGCGAGGCGGCGGCGGCGGCGGCCCTATAAAAAGCGAA  
GCGCGCGGCGGGCGGGGAGTCGCTGCGACGCTGCCTTCGCCCCGTGCCCC  
GCTCCGCCGCCGCTCGCGCCGCCCGCCCCGGCTCTGACTGACCGCGTTAC  
TCCCACAGGTGAGCGGGCGGGACGGCCCTTCTCCTCCGGGCTGTAATTAGC  
GCTTGGTTTAATGACGGCTTGTTCCTTTCTGTGGCTGCGTGAAAGCCTTGA  
GGGGCTCCGGGAGGGCCCTTTGTGCGGGGGGAGCGGCTCGGGGGGTGCG  
TGCGTGTGTGTGTGCGTGGGGAGCGCCGCGTGCGGCTCCGCGCTGCCCGG  
CGGCTGTGAGCGCTGCGGGCGCGGCGCGGGGCTTTGTGCGCTCCGCAGTG  
TGCGCGAGGGGAGCGCGGCCGGGGGCGGTGCCCGCGGTGCGGGGGGGG  
CTGCGAGGGGAACAAAGGCTGCGTGCGGGGTGTGTGCGTGGGGGGGTGA  
GCAGGGGGTGTGGGCGCGTCGGTCGGGCTGCAACCCCCCTGCACCCCC  
TCCCCGAGTTGCTGAGCACGGCCCGGCTTCGGGTGCGGGGCTCCGTACGG

GGCGTGGCGCGGGGCTCGCCGTGCCGGGCGGGGGGTGGCGGCAGGTGGG  
GGTGCCGGGCGGGGCGGGGCCGCCTCGGGCCGGGGAGGGCTCGGGGGAG  
GGGCGCGGCGGCCCGGAGCGCCGGCGGCTGTCGAGGCGCGGGCGAGCC  
GCAGCCATTGCCTTTTATGGTAATCGTGCGAGAGGGCGCAGGGACTTCCTT  
TGTCCCAAATCTGTGCGGAGCCGAAATCTGGGAGGCGCCGCCGCACCCCC  
TCTAGCGGGCGCGGGGCGAAGCGGTGCGGGCGCCGGCAGGAAGGAAATGG  
GCGGGGAGGGCCTTCGTGCGTCGCCGCGCCGCGTCCCCTTCTCCCTCTCC  
AGCCTCGGGGCTGTCCGCGGGGGGACGGCTGCCTTCGGGGGGGACGGGG  
CAGGGCGGGGTTTCGGCTTCTGGCGTGTGACCGGCGGCTCTAGAGCCTCTG  
CTAACCATGTTTCATGCCTTCTTCTTTTTCTACAGCTCCTGGGCAACGTGCT  
GGTTATTGTGCTGTCTCATCATTTTGGCAAAGAATTGGAATTCGCCGCCACC  
ATGCCTAAAAGAAAAGAAAGGTGGGTTCTGGTATCGAGAAGAAGAAGA  
GCTTCGCCAAGGGCATGGGAGTGAAGAGCACCTGGTGTCCGGCTCTAAG  
GTGTACATGACCACATTTGCTGAGGGAAGCGACGCCAGGCTGGAGAAGAT  
CGTGGAGGGCGATAGCATCAGATCCGTGAACGAGGGAGAGGCTTTCAGCG  
CCGAGATGGCTGACAAGAACGCTGGCTACAAGATCGGAAACGCCAAGTTT  
TCCCACCCAAAGGGCTACGCCGTGGTGGCTAACAACCCACTGTACACCGG  
ACCAGTGCAGCAGGACATGCTGGGACTGAAGGAGACACTGGAGAAGAGG  
TACTTCGGCGAGTCCGCCGACGGAAACGATAACATCTGCATCCAGGTCATC  
CACAACATCCTGGATATCGAGAAGATCCTGGCTGAGTACATCACAAACGCC  
GCTTACGCCGTGAACAACATCTCCGGCCTGGACAAGGATATCATCGGCTTC  
GGAAAGTTTTCTACCGTGTACACATACGACGAGTTCAAGGATCCAGAGCAC  
CACCGGGCCGCTTTTAAACAACAACGACAAGCTGATCAACGCCATCAAGGC  
TCAGTACGACGAGTTCGATAACTTTCTGGATAACCCAGGCTGGGCTACTT  
CGGACAGGCTTTCTTTTCTAAGGAGGGCAGAACTACATCATCAACTACGG  
AAACGAGTGTTACGACATCCTGGCCCTGCTGAGCGGACTGAGGCACTGGG  
TGGTGCACAACAACGAGGAGGAGTCTCGGATCAGCCGCACCTGGCTGTAC  
AACCTGGACAAGAACCTGGATAACGAGTACATCTCCACACTGAACTACCTG  
TACGACAGGATACCAACGAGCTGACAAACAGCTTCTCCAAGAACTCTGC  
CGCTAACGTGAACTACATCGCTGAGACCCTGGGCATCAACCCAGCTGAGTT

CGCTGAGCAGTACTTCAGATTTTCCATCATGAAGGAGCAGAAGAACCTGGG  
CTTCAACATCACAAAGCTGAGAGAAGTGATGCTGGACAGAAAGGATATGT  
CCGAGATCAGGAAGAACCACAAGGTGTTTCGATTCTATCAGAACCAAGGTG  
TACACAATGATGGACTTTGTGATCTACAGGTACTACATCGAGGAGGATGCC  
AAGGTGGCCGCTGCCAACAAGAGCCTGCCCGACAACGAGAAGTCTCTGA  
GCGAGAAGGATATCTTCGTGATCAACCTGAGAGGCTCCTTTAACGACGATC  
AGAAGGACGCTCTGTACTACGATGAGGCCAACAGGATCTGGAGAAAGCTG  
GAGAACATCATGCACAACATCAAGGAGTTCCGGGGAAACAAGACCCGCGA  
GTACAAGAAGAAGGACGCTCCAAGGCTGCCTAGGATCCTGCCTGCTGGAA  
GGGACGTGAGCGCCTTCAGCAAGCTGATGTACGCCCTGACAATGTTTCTGG  
ACGGAAAGGAGATCAACGATCTGCTGACCACACTGATCAACAAGTTCGAC  
AACATCCAGTCTTTTCTGAAAGTGATGCCTCTGATCGGCGTGAACGCTAAG  
TTCGTGGAGGAGTACGCCTTCTTTAAGGACAGCGCCAAGATCGCTGATGAG  
CTGCGGCTGATCAAGTCCTTTGCCAGGATGGGAGAGCCAATCGCTGACGCT  
AGGAGAGCTATGTACATCGATGCCATCCGGATCCTGGGAACCAACCTGTCT  
TACGACGAGCTGAAGGCTCTGGCCGACACCTTCAGCCTGGATGAGAACGG  
CAACAAGCTGAAGAAGGGCAAGCACGGAATGCGCAACTTCATCATCAACA  
ACGTGATCAGCAACAAGCGGTTTCACTACCTGATCAGATACGGCGACCCAG  
CTCACCTGCACGAGATCGCTAAGAACGAGGCCGTGGTGAAGTTCGTGCTG  
GGACGGATCGCCGATATCCAGAAGAAGCAGGGCCAGAACGGAAAGAACC  
AGATCGACCGCTACTACGAGACCTGCATCGGCAAGGATAAGGGAAAGTCC  
GTGTCTGAGAAGGTGGACGCTCTGACCAAGATCATCACAGGCATGAACTA  
CGACCAGTTCGATAAGAAGAGATCTGTGATCGAGGACACCGGAAGGGAGA  
ACGCCGAGAGAGAGAAGTTTAAGAAGATCATCAGCCTGTACCTGACAGTG  
ATCTACCACATCCTGAAGAACATCGTGAACATCAACGCTAGATACGTGATC  
GGCTTCCACTGCGTGGAGCGCGATGCCAGCTGTACAAGGAGAAGGGATA  
CGACATCAACCTGAAGAAGCTGGAGGAGAAGGGCTTTAGCTCCGTGACCA  
AGCTGTGCGCTGGAATCGACGAGACAGCCCCGACAAGAGGAAGGATGTG  
GAGAAGGAGATGGCCGAGAGAGCTAAGGAGAGCATCGACTCCCTGGAGTC  
TGCTAACCCCTAAGCTGTACGCCAACTACATCAAGTACTCCGATGAGAAGAA

GGCCGAGGAGTTCACCAGGCAGATCAACAGAGAGAAGGCCAAGACCGCT  
CTGAACGCCTACCTGAGGAACACAAAGTGGAACGTGATCATCCGGGAGGA  
CCTGCTGCGCATCGATAACAAGACCTGTACTGTTCGGGAACAAGGCTGT  
GCACCTGGAGGTGGCTCGCTACGTGCACGCCTACATCAACGACATCGCCGA  
GGTGAACCTCCTACTTTCAGCTGTACCACTACATCATGCAGAGGATCATCATG  
AACGAGAGATACGAGAAGTCTAGCGGCAAGGTGTCTGAGTACTTCGACGC  
CGTGAACGATGAGAAGAAGTACAACGATAGACTGCTGAAGCTGCTGTGCG  
TGCCTTTCGGATACTGTATCCCACGGTTTAAGAACCTGAGCATCGAGGCCCT  
GTTTCGACCGCAACGAGGCTGCCAAGTTTGATAAGGAGAAGAAGAAGGTGA  
GCGGCAACTCCGGTTCTGGTCTCGAGCCCAAGAAGAAGAGGAAAGTCCTC  
GAGGCTACTAACTTCAGCCTGCTGAAGCAGGCTGGAGACGTGGAGGAGAA  
CCCTGGACCTATGCATATGGTGAGCAAGGGCGAGGAGGATAACATGGCCAT  
CATCAAGGAGTTCATGCGCTTCAAGGTGCACATGGAGGGCTCCGTGAACG  
GCCACGAGTTCGAGATCGAGGGCGAGGGCGAGGGCCGCCCTACGAGGG  
CACCCAGACCGCCAAGCTGAAGGTGACCAAGGGTGGCCCCCTGCCCTTCG  
CCTGGGACATCCTGTCCCCTCAGTTCATGTACGGCTCCAAGGCCTACGTGA  
AGCACCCCGCCGACATCCCCGACTACTTGAAGCTGTCCTTCCCCGAGGGCT  
TCAAGTGGGAGCGCGTGATGAACTTCGAGGACGGCGGCGTGTTGACCGTG  
ACCCAGGACTCCTCCCTGCAGGACGGCGAGTTCATCTACAAGGTGAAGCT  
GCGCGGCACCAACTTCCCCTCCGACGGCCCCGTAATGCAGAAGAAGACCA  
TGGGCTGGGAGGCCTCCTCCGAGCGGATGTACCCCGAGGACGGCGCCCTG  
AAGGGCGAGATCAAGCAGAGGCTGAAGCTGAAGGACGGCGGCCACTACG  
ACGCTGAGGTCAAGACCACCTACAAGGCCAAGAAGCCCGTGCAGCTGCC  
GGCGCCTACAACGTCAACATCAAGTTGGACATCACCTCCCACAACGAGGA  
CTACACCATCGTGGAACAGTACGAACGCGCCGAGGGCCGCCACTCCACCG  
GCGGCATGGACGAGCTGTACAAGTAAACGCTAGCTAGAATCAACCTCTGGA  
TTACAAAATTTGTGAAAGATTGACTGGTATTCTTAACTATGTTGCTCCTTTA  
CGCTATGTGGATACGCTGCTTTAATGCCTTTGTATCATGCTATTGCTTCCCGT  
ATGGCTTTCATTTTCTCCTCCTTGTATAAATCCTGGTTGCTGTCTCTTTATGA  
GGAGTTGTGGCCCGTTGTCAGGCAACGTGGCGTGGTGTGCACTGTGTTTG

CTGACGCAACCCCCACTGGTTGGGGCATTGCCACCACCTGTCAGCTCCTTT  
CCGGGACTTTCGCTTTCCTTCCCTATTGCCACGGCGGAACATCGCCG  
CCTGCCTTGCCCGCTGCTGGACAGGGGCTCGGCTGTTGGGCACTGACAATT  
CCGTGGTGTTCGCGGGAAATCATCGTCCTTTCCTTGGCTGCTCGCCTGTGT  
TGCCACCTGGATTCTGCGCGGGACGTCCTTCTGCTACGTCCCTTCGGCCCT  
CAATCCAGCGGACCTTCCCTTCCCGCGGCCTGCTGCCGGCTCTGCGGCCTCT  
TCCGCGTCTTCGCCTTCGCCCTCAGACGAGTCGGATCTCCCTTTGGGCCGC  
CTCCCCGCATCGATACCGTCGACCTCGACTGTGCCTTCTAGTTGCCAGCCAT  
CTGTTGTTTGCCCCCTCCCCCGTGCCTTCCCTTGACCCTGGAAGGTGCCACTC  
CCACTGTCCTTTCCTAATAAAATGAGGAAATTGCATCGCATTGTCTGAGTAG  
GTGTCATTCTATTCTGGGGGGTGGGGTGGGGCAGGACAGCAAGGGGGAGG  
ATTGGGAAGACAATAGCAGGCATGCTGGGGATAACTTTAAATAATTGGCATT  
ATTTAAAGTTAACGCGTACAAGTTTGTACAAAAAAGCTGAACGAGAAACGT  
AAAATGATATAAATATCAATATATTAAATTAGATTTTGCATAAAAAACAGACT  
ACATAATACTGTAAAACACAACATATCCAGTCACTATGCTGCATTAATGAAT  
CGGCCAACGCGCGGGGAGAGGCGGTTTGCATATTGGGCGCTCTTCCGCTTC  
CTCGCTCACTGACTCGCTGCGCTCGGTCGTTCCGGCTGCGGCGAGCGGTATC  
AGCTCACTCAAAGGCGGTAATACGGTTATCCACAGAATCAGGGGATAACGC  
AGGAAAGAACATGTGAGCAAAAGGCCAGCAAAAGGCCAGGAACCGTAAA  
AAGGCCGCGTTGCTGGCGTTTTTCCATAGGCTCCGCCCCCTGACGAGCAT  
CACAAAATCGACGCTCAAGTCAGAGGTGGCGAAACCCGACAGGACTATA  
AAGATACCAGGCGTTTCCCCCTGGAAGCTCCCTCGTGCGCTCTCCTGTTCC  
GACCCTGCCGCTTACCGGATACCTGTCCGCCTTCTCCCTTCGGGAAGCGT  
GGCGCTTCTCATAGCTCACGCTGTAGGTATCTCAGTTCGGTGTAGGTCGTT  
CGCTCCAAGCTGGGCTGTGTGCACGAACCCCCGTTTCAGCCCGACCGCTG  
CGCCTTATCCGGTAACTATCGTCTTGAGTCCAACCCGGTAAGACACGACTTA  
TCGCCACTGGCAGCAGCCACTGGTAACAGGATTAGCAGAGCGAGGTATGT  
AGGCGGTGCTACAGAGTTCTTGAAGTGGTGGCCTAACTACGGCTACACTAG  
AAGAACAGTATTTGGTATCTGCGCTCTGCTGAAGCCAGTTACCTTCGGAAA  
AAGAGTTGGTAGCTCTTGATCCGGCAAACAAACCACCGCTGGTAGCGGTG



GTTTTTTTGTGGCAAGCAGCAGATTACGCGCAGAAAAAAGGATCTCAAG  
AAGATCCTTTGATCTTTTCTACGGGGTCTGACGCTCAGTGGAACGAAA  
CACGTTAAGGGATTTTGGTCATGAGATTATCAAAAAGGATCTTCACCTAGAT  
CCTTTTAAATTAATAAATGAAGTTTTAAATCAATCTAAAGTATATATGAGTAAA  
CTTGGTCTGACAGTTACCAATGCTTAATCAGTGAGGCACCTATCTCAGCGAT  
CTGTCTATTTTCGTTTCATCCATAGTTGCCTGACTCCCCGTCGTGTAGATAACTA  
CGATACGGGAGGGCTTACCATCTGGCCCCAGTGCTGCAATGATACCGCGAG  
ACCCACGCTCACCGGCTCCAGATTTATCAGCAATAAACAGCCAGCCGGAA  
GGGCCGAGCGCAGAAGTGGTCCTGCAACTTTATCCGCCTCCATCCAGTCTA  
TTAATTGTTGCCGGGAAGCTAGAGTAAGTAGTTCGCCAGTTAATAGTTTGCG  
CAACGTTGTTGCCATTGCTACAGGCATCGTGGTGTACGCTCGTCGTTTGGT  
ATGGCTTCATTCAGCTCCGGTTCCTAACGATCAAGGCGAGTTACATGATCCC  
CCATGTTGTGCAAAAAGCGGTTAGCTCCTTCGGTCCTCCGATCGTTGTCA  
GAAGTAAGTTGGCCGCAGTGTTATCACTCATGGTTATGGCAGCACTGCATAA  
TTCTCTTACTGTCATGCCATCCGTAAGATGCTTTTCTGTGACTGGTGAGTAC  
TCAACCAAGTCATTCTGAGAATAGTGTATGCGGCGACCGAGTTGCTCTTGC  
CCGGCGTCAATACGGGATAATACCGCGCCACATAGCAGAACTTTAAAAGTG  
CTCATCATTGGAAAACGTTCTTCGGGGCGAAAACCTCTCAAGGATCTTACCG  
CTGTTGAGATCCAGTTCGATGTAACCCACTCGTGCACCCAACTGATCTTCA  
GCATCTTTTACTTTCACCAGCGTTTCTGGGTGAGCAAAAACAGGAAGGCAA  
AATGCCGCAAAAAGGGAATAAGGGCGACACGGAAATGTTGAATACTCAT  
ACTCTTCCTTTTTCAATATTATTGAAGCATTATCAGGGTTATTGTCTCATGA  
GCGGATACATATTTGAATGTATTTAGAAAAATAAACAAATAGGGGTTCGCG  
CACATTTCCCCGAAAAGTGCCACCTGACGTCTAAGAAACCATTATTATCATG  
ACATTAACCTATAAAAATCAAATAATGATTTTATTTGACTGATAGTGACCTG  
TTCGTTGCAACAAATTGATGAGCAATGCTTTTTTATAATGCCAACTTTGTAC  
AAAAAAGCAGGCTGTGACGATGTAGGTCACGGTCTCGAAGCCGCGGTGC  
GGGTGCCAGGGCGTGCCCTTGGGCTCCCCGGGCGCGTACTCCACCTCACC  
CATCTGGTCCATCATGATGAACGGGTCGAGGTGGCGGTAGTTGATCCCGGC

**Htra2-EGFP plasmid: the sequence of Htra2 and EGFP are colored in blue and green respectively**

GACGGATCGGGAGATCTCCCGATCCCCTATGGTGC ACTCTCAGTACAATCT  
GCTCTGATGCCGCATAGTTAAGCCAGTATCTGCTCCCTGCTTGTGTGTTGGA  
GGTCGCTGAGTAGTGCGCGAGCAAATTTAAGCTACAACAAGGCAAGGCT  
TGACCGACAATTGCATGAAGAATCTGCTTAGGGTTAGGCGTTTTGCGCTGC  
TTCGCGATGTACGGGCCAGATATACGCGTTGACATTGATTATTGACTAGTTAT  
TAATAGTAATCAATTACGGGGTCATTAGTTCATAGCCCATATATGGAGTTCCG  
CGTTACATAACTTACGGTAAATGGCCCGCCTGGCTGACCGCCCAACGACCC  
CCGCCATTGACGTCAATAATGACGTATGTTCCCATAGTAACGCCAATAGGG  
ACTTTCATTGACGTCAATGGGTGGAGTATTTACGGTAAACTGCCCACTTGG  
CAGTACATCAAGTGTATCATATGCCAAGTACGCCCCCTATTGACGTCAATGA  
CGGTAAATGGCCCGCCTGGCATTATGCCCAGTACATGACCTTATGGGACTTT  
CCTACTTGGCAGTACATCTACGTATTAGTCATCGCTATTACCATGGTGATGCG  
GTTTTGGCAGTACATCAATGGGCGTGGATAGCGGTTTGACTCACGGGGATT  
TCCAAGTCTCCACCCCATTGACGTCAATGGGAGTTTGT TTTGGCACCAAAA  
TCAACGGGACTTTCCAAAATGTCGTAACA ACTCCGCCCCATTGACGCAAAT  
GGGCGGTAGGCGTGTACGGTGGGAGGTCTATATAAGCAGAGCTCTCTGGCT  
AACTAGAGAACCCACTGCTTACTGGCTTATCGAAATTAATACGACTCACTAT  
AGGGAGACCCAAGCTGGCTAGCGTTTAAACGGGCCCTCTAGACTCGAGAT  
GGTGAGCAAGGGCGAGGAGCTGTTACCGGGGTGGTGCCCATCCTGGTCG  
AGCTGGACGGCGACGTAAACGGCCACAAGTTCAGCGTGTCCGGCGAGGGC  
GAGGGCGATGCCACCTACGGCAAGCTGACCCTGAAGTTCATCTGCACCAC  
CGGCAAGCTGCCCGTGCCCTGGCCACCCTCGTGACCACCCTGACCTACG  
GCGTGCAGTGCTTCAGCCGCTACCCCGACCACATGAAGCAGCACGACTTCT  
TCAAGTCCGCCATGCCCGAAGGCTACGTCCAGGAGCGCACCATCTTCTTCA  
AGGACGACGGCAACTACAAGACCCGCGCCGAGGTGAAGTTCGAGGGCGA  
CACCTGGTGAACCGCATCGAGCTGAAGGGCATCGACTTCAAGGAGGACG  
GCAACATCCTGGGGCACAAGCTGGAGTACA ACTACAACAGCCACAACGTC  
TATATCATGGCCGACAAGCAGAAGAACGGCATCAAGGTGAACTTCAAGATC

CGCCACAACATCGAGGACGGCAGCGTGCAGCTCGCCGACCACTACCAGCA  
GAACACCCCCATCGGCGACGGCCCCGTGCTGCTGCCCGACAACCACTACC  
TGAGCACCCAGTCCGCCCTGAGCAAAGACCCCAACGAGAAGCGCGATCAC  
ATGGTCCTGCTGGAGTTCGTGACCGCCGCCGGGATCACTCTCGGCATGGAC  
GAGCTGTACAAGGGATCCGCGGCCGCTGAGGGCAGAGGAAGTCTTCTAAC  
ATGCGGTGACGTGGAGGAGAATCCCGGCCCTCTTAAGATGGCTGCGCTGA  
AAGCGGGGCGGGGTGCAAACCTGGAGCCTTCGGGCATGGCGGGCTTTGGGG  
GGCATCTTCTGGAGGAAGCCTCCCCTGTTAGCTCCTGACCTCCGGGCTCTG  
CTGACGTCAGGAACTCCTGACTCTCAGATCTGGATGACTTATGGGACCCCC  
AGTCTCCCGGCCAGGTGCCTGAGGGGTTCTTGCATCACGGGCAGATCTG  
ACGTCTAGGACCCCGGATCTCTGGGCACGATTGAATGTGGGGACTTCAGGC  
TCCAGTGACCAGGAGGCCCGCAGGAGCCCTGGAAGCCGTCGGCGCGAATG  
GCTGGCGGTGGCGGTGGGCGCAGGAGGTGCAGTGGTGCTGCTGTTGTGGG  
GTTGGGGTCGGGGTCTTCCACGGTGCTGGCTGCTGTTCTGCTCCGCCAC  
CCACTTCTCCCCGGAGCCAGTACAATTCATCGCAGATGTGGTGGAGAAGA  
CAGCCCCTGCTGTGGTCTATATCGAGATCCTAGACCGGCACCCTTTCTCCGG  
CCGTGAAGTCCCCATCTCAAACGGATCAGGATTCGTAGTGGCTTCAGATGG  
GCTCATCGTTACCAACGCCACGTGGTGGCTGATCGGCGCCGAGTACGAGT  
GAGGCTGCCTAGCGGGGATACTTATGAGGCCATGGTCACAGCTGTGGATCC  
CGTAGCAGACATTGCCACACTGAGGATTCAAACCAAGGAGCCTCTTCCCAC  
ACTGCCCTCGGCCGCTCTGCTGATGTCCGGCAAGGGGAGTTTGTGTTGC  
CATGGGAAGCCCCTTGCCTGCAGAACACGATCACATCTGGTATTGTCAG  
CTCTGCTCAGCGCCAGCCAGGGACCTGGGACTCCCTCAAACAACGTGG  
AATACATTCAGACCGATGCAGCTATTGATTTTGGAAATTCTGGTGGTCCCCT  
GGTTAACCTGGATGGGGAGGTGATTGGAGTGAACACCATGAAGGTGACAG  
CTGGAATCTCCTTTGCCATCCCTTCTGATCGCCTTAGGGAGTTTCTGCATCG  
CGGGGAAAAGAAAATTCTGGTTTGGAAACCAGTGGGTCCCAGCGCCGCT  
ACATTGGAGTGATGATGCTGACCCTGACTCCCAGCATCCTTATTGAACTACA  
GCTCCGTGAGCCAAGCTTCCCTGATGTTTCAGCATGGTGTCTCATTATAAA  
GTTATCCTGGGCTCCCCCGCACACAGGGCTGGTCTGCGGCCTGGTGATGTG

ATCTTGGCCATTGGGGAGAAATTGGCACAAAATGCTGAAGATGTTTATGAA  
GCTGTTTGAACCAATCACAGCTGGCAGTGCGGATCCGGCGCGGATCAGA  
GACACTGACCTTATATGTGACCCCCGAGGTCACAGAATGAAAGCTTAAGTT  
TAAACCGCTGATCAGCCTCGACTGTGCCTTCTAGTTGCCAGCCATCTGTTGT  
TTGCCCCCTCCCCCGTGCCTTCTTGACCCTGGAAGGTGCCACTCCCCTGT  
CCTTTCCTAATAAAATGAGGAAATTGCATCGCATTGTCTGAGTAGGTGTCAT  
TCTATTCTGGGGGGTGGGGTGGGGCAGGACAGCAAGGGGGAGGATTGGGA  
AGACAATAGCAGGCATGCTGGGGATGCGGTGGGCTCTATGGCTTCTGAGGC  
GGAAAGAACCAGCTGGGGCTCTAGGGGGTATCCCCACGCGCCCTGTAGCG  
GCGCATTAAAGCGCGGCGGGTGTGGTGGTTACGCGCAGCGTGACCGCTACA  
CTTGCCAGCGCCCTAGCGCCCGCTCCTTTCGCTTCTTCCCTTCCTTCTCG  
CCACGTTTCGCCGGCTTCCCCGTCAAGCTCTAAATCGGGGGCTCCCTTTAG  
GGTTCGATTTAGTGCTTACGGCACCTCGACCCCAAAAACTTGATTAGG  
GTGATGGTTCACGTAGTGGGCCATCGCCCTGATAGACGGTTTTTCGCCCTT  
GACGTTGGAGTCCACGTTCTTTAATAGTGGACTCTTGTTCCAAACTGGAAC  
AACACTCAACCCTATCTCGGTCTATTCTTTTGATTTATAAGGGATTTTGCCGA  
TTTCGGCCTATTGGTTAAAAAATGAGCTGATTTAACAAAAATTTAACGCGAA  
TTAATTCTGTGGAATGTGTGTCAGTTAGGGTGTGGAAAGTCCCCAGGCTCC  
CCAGCAGGCAGAAGTATGCAAAGCATGCATCTCAATTAGTCAGCAACCAG  
GTGTGGAAAGTCCCCAGGCTCCCCAGCAGGCAGAAGTATGCAAAGCATGC  
ATCTCAATTAGTCAGCAACCATAGTCCCGCCCCTAACTCCGCCATCCCGCC  
CCTAACTCCGCCAGTTCGGCCATTCTCCGCCCATGGCTGACTAATTTTT  
TTTATTTATGCAGAGGCCGAGGCCGCTCTGCCTCTGAGCTATTCCAGAAGT  
AGTGAGGAGGCTTTTTTGGAGGCCTAGGCTTTTGCAAAAAGCTCCCCGGGA  
GCTTGTATATCCATTTTCGGATCTGATCAAGAGACAGGATGAGGATCGTTTC  
GCATGATTGAACAAGATGGATTGCACGCAGGTTCTCCGGCCGCTTGGGTGG  
AGAGGCTATTCGGCTATGACTGGGCACAACAGACAATCGGCTGCTCTGATG  
CCGCCGTGTTCCGGCTGTCAGCGCAGGGGCGCCCGGTTCTTTTTGTCAAGA  
CCGACCTGTCCGGTGCCCTGAATGAACTGCAGGACGAGGCAGCGCGGCTA  
TCGTGGCTGGCCACGACGGGCGTTCCTTGCGCAGCTGTGCTCGACGTTGTC

ACTGAAGCGGGAAGGGACTGGCTGCTATTGGGCGAAGTGCCGGGGCAGGA  
TCTCCTGTCATCTCACCTTGCTCCTGCCGAGAAAGTATCCATCATGGCTGAT  
GCAATGCGGCGGCTGCATACGCTTGATCCGGCTACCTGCCATTCGACCAC  
CAAGCGAAACATCGCATCGAGCGAGCACGTA CTCCGGATGGAAGCCGGTCT  
TGTCGATCAGGATGATCTGGACGAAGAGCATCAGGGGCTCGCGCCAGCCG  
AACTGTTCCGCCAGGCTCAAGGCGCGCATGCCCGACGGCGAGGATCTCGTC  
GTGACCCATGGCGATGCCTGCTTGCCGAATATCATGGTGGAAAATGGCCGC  
TTTTCTGGATTCATCGACTGTGGCCGGCTGGGTGTGGCGGACCGCTATCAG  
GACATAGCGTTGGCTACCCGTGATATTGCTGAAGAGCTTGGCGGCCGAATGG  
GCTGACCGCTTCCTCGTGCTTTACGGTATCGCCGCTCCCGATTCGCAGCGCA  
TCGCCTTCTATCGCCTTCTTGACGAGTTCTTCTGAGCGGGACTCTGGGGTTC  
GAAATGACCGACCAAGCGACGCCAACCTGCCATCACGAGATTCGATTCC  
ACCGCCGCCTTCTATGAAAGGTTGGGCTTCGGAATCGTTTTCCGGGACGCC  
GGCTGGATGATCCTCCAGCGCGGGGATCTCATGCTGGAGTTCTTCGCCAC  
CCCAACTTGTTTATTGCAGCTTATAATGGTTACAAATAAAGCAATAGCATCA  
CAAATTCACAAATAAAGCATTTTTTTCACTGCATTCTAGTTGTGGTTTGTG  
CAAATTCATCAATGTATCTTATCATGTCTGTATAACCGTCGACCTCTAGCTAGA  
GCTTGGCGTAATCATGGTCATAGCTGTTTCCCTGTGTGAAATTGTTATCCGCT  
CACAATTCCACACAACATACGAGCCGGAAGCATAAAGTGTAAGCCTGGG  
GTGCCTAATGAGTGAGCTAACTCACATTAATTGCGTTGCGCTCACTGCCCGC  
TTTCCAGTCGGGAAACCTGTCGTGCCAGCTGCATTAATGAATCGGCCAACG  
CGCGGGGAGAGGCGGTTTTCGTATTGGGCGCTCTTCCGCTTCTCGCTCAC  
TGACTCGCTGCGCTCGGTCGTTCCGGCTGCGGCGAGCGGTATCAGCTCACTC  
AAAGGCGGTAATACGGTTATCCACAGAATCAGGGGATAACGCAGGAAAGA  
ACATGTGAGCAAAGGCCAGCAAAGGCCAGGAACCGTAAAAAGGCCGC  
GTTGCTGGCGTTTTTCCATAGGCTCCGCCCCCTGACGAGCATCACAAAA  
TCGACGCTCAAGTCAGAGGTGGCGAAACCCGACAGGACTATAAAGATACC  
AGGCGTTTCCCCCTGGAAGCTCCCTCGTGCGCTCTCCTGTTCCGACCCTGC  
CGCTTACCGGATACCTGTCCGCCTTTCTCCCTTCGGGAAGCGTGGCGCTTTC  
TCATAGCTCACGCTGTAGGTATCTCAGTTCGGTGTAGGTGCTTCGCTCCAAG

CTGGGCTGTGTGCACGAACCCCCGTTAGCCCGACCGCTGCGCCTTATCC  
GGTAACTATCGTCTTGAGTCCAACCCGGTAAGACACGACTTATCGCCACTG  
GCAGCAGCCACTGGTAACAGGATTAGCAGAGCGAGGTATGTAGGCGGTGC  
TACAGAGTTCTTGAAGTGGTGGCCTAACTACGGCTACACTAGAAGAACAGT  
ATTTGGTATCTGCGCTCTGCTGAAGCCAGTTACCTTCGGAAAAAGAGTTGG  
TAGCTCTTGATCCGGCAAACAAACCACCGCTGGTAGCGGTTTTTTTTGTTG  
CAAGCAGCAGATTACGCGCAGAAAAAAGGATCTCAAGAAGATCCTTTGA  
TCTTTTCTACGGGGTCTGACGCTCAGTGGAACGAAAACCTCACGTTAAGGGA  
TTTTGGTCATGAGATTATCAAAAAGGATCTTCACCTAGATCCTTTTAAATTA  
AAAATGAAGTTTTAAATCAATCTAAAGTATATATGAGTAAACTTGGTCTGAC  
AGTTACCAATGCTTAATCAGTGAGGCACCTATCTCAGCGATCTGTCTATTTT  
GTTTCATCCATAGTTGCCTGACTCCCCGTCGTGTAGATAACTACGATACGGGA  
GGGCTTACCATCTGGCCCCAGTGCTGCAATGATACCGCGAGACCCACGCTC  
ACCGGCTCCAGATTTATCAGCAATAAACCAGCCAGCCGGAAGGGCCGAGC  
GCAGAAGTGGTCCTGCAACTTTATCCGCCTCCATCCAGTCTATTAATTGTTG  
CCGGGAAGCTAGAGTAAGTAGTTCGCCAGTTAATAGTTTGGCGAACGTTGT  
TGCCATTGCTACAGGCATCGTGGTGTACGCTCGTCGTTTGGTATGGCTTCA  
TTCAGCTCCGGTTCCCAACGATCAAGGCGAGTTACATGATCCCCATGTTGT  
GCAAAAAAGCGGTTAGCTCCTTCGGTCCTCCGATCGTTGTCAGAAGTAAGT  
TGCCCGCAGTGTTATCACTCATGGTTATGGCAGCACTGCATAATTCTCTTAC  
TGTCATGCCATCCGTAAGATGCTTTTTCTGTGACTGGTGAGTACTCAACCAA  
GTCATTCTGAGAATAGTGTATGCGGCGACCGAGTTGCTCTTGCCCGGCGTC  
AATACGGGATAATACCGCGCCACATAGCAGAACTTTAAAAGTGCTCATCATT  
GGAAAACGTTCTTCGGGGCGAAAACCTCTCAAGGATCTTACCGCTGTTGAGA  
TCCAGTTCGATGTAACCCACTCGTGCACCCAACCTGATCTTCAGCATCTTTTA  
CTTTCACCAGCGTTTCTGGGTGAGCAAAAACAGGAAGGCAAAATGCCGCA  
AAAAAGGGAATAAGGGCGACACGGAAATGTTGAATACTCATACTCTTCCTT  
TTTCAATATTATTGAAGCATTATCAGGGTTATTGTCTCATGAGCGGATACAT  
ATTTGAATGTATTTAGAAAAATAAACAATAGGGGTTCGCGCACATTTCCC  
CGAAAAGTGCCACCTGACGTC

## Supplemental figures

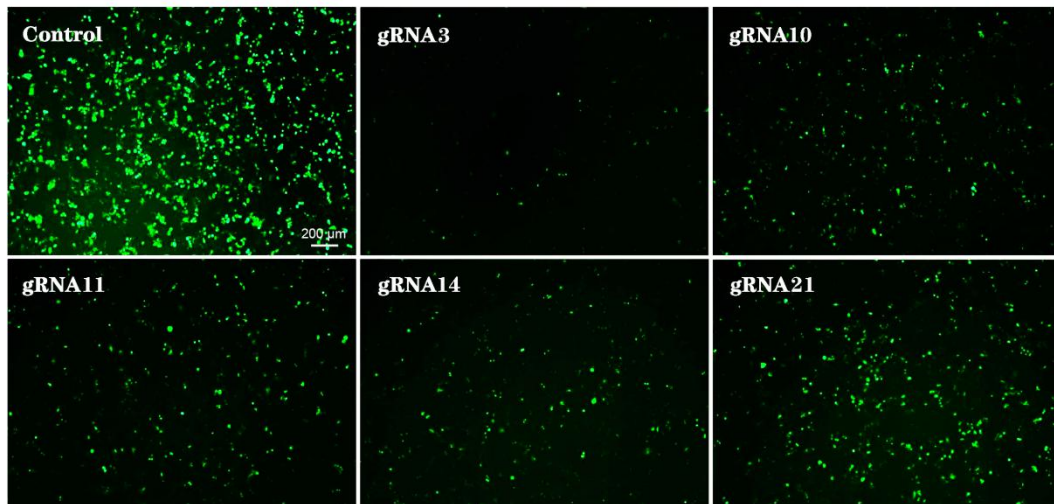

**Figure S1.** The fluorescent images of HEK293T-cells at 48 hours after transfection with CasRx-mCherry plasmid, Htra2-EGFP plasmid, and the top five gRNAs of high knockdown efficiency. Scale bar: 200  $\mu\text{m}$ .

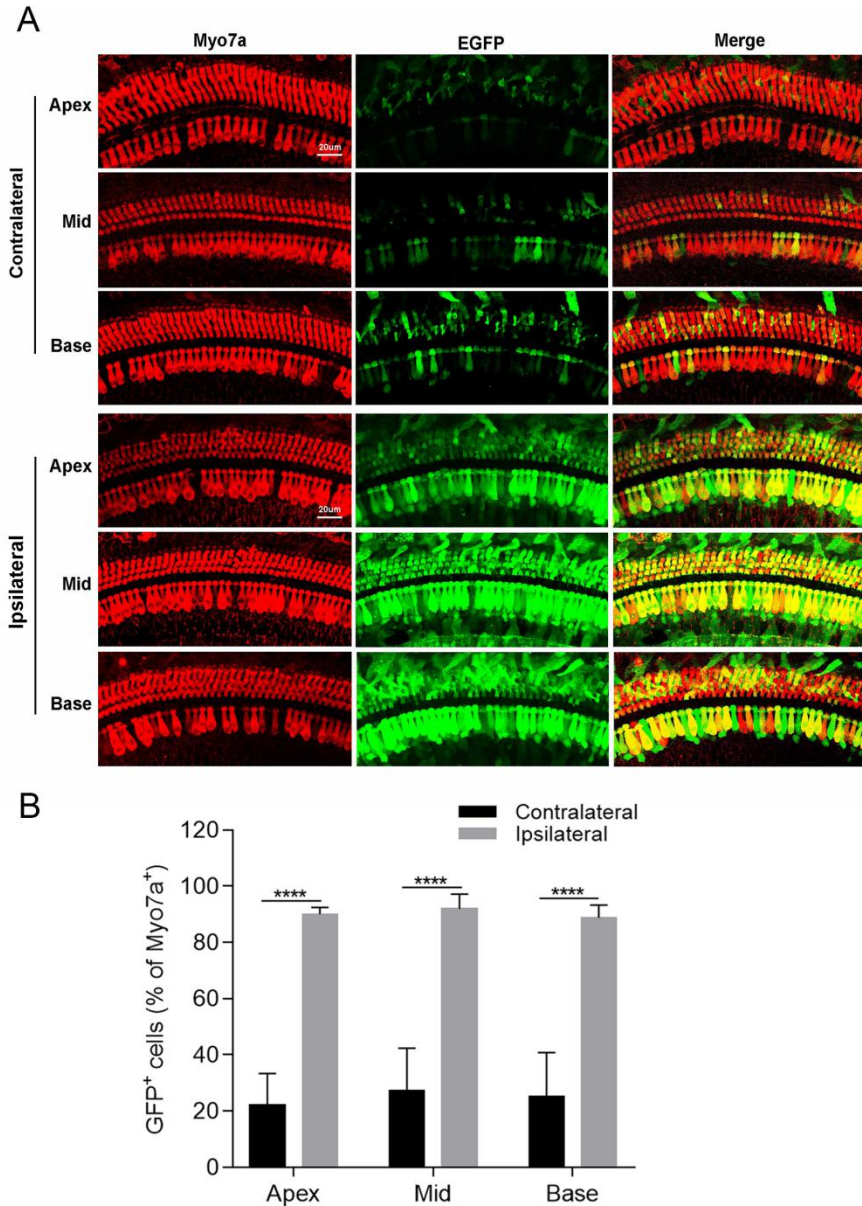

**Figure S2.** The transduction efficiency of AAV-PHP.eB-EGFP in cochlear hair cells. (A) The cochleae from both ears were dissected for immunostaining with Myo7a (red) and EGFP (green) antibodies. The respective confocal images were taken in the apical, middle, and basal turns of AAV-injected and non-injected ears. Scale bar = 20  $\mu$ m. Ipsilateral: the cochleae with AAV-PHP.eB-EGFP injection; contralateral: the cochleae without AAV-PHP.eB-EGFP injection. (B) The percentage of EGFP positive cells per 100  $\mu$ m sensory hair cells in apex, mid and base turns in AAV-PHP.eB-EGFP-injected cochleae. Data were presented as the mean  $\pm$  SD. Unpaired two-tailed Student's *t*-test was used for statistical analysis, \*\*\*\* $p < 0.0001$  vs contralateral.



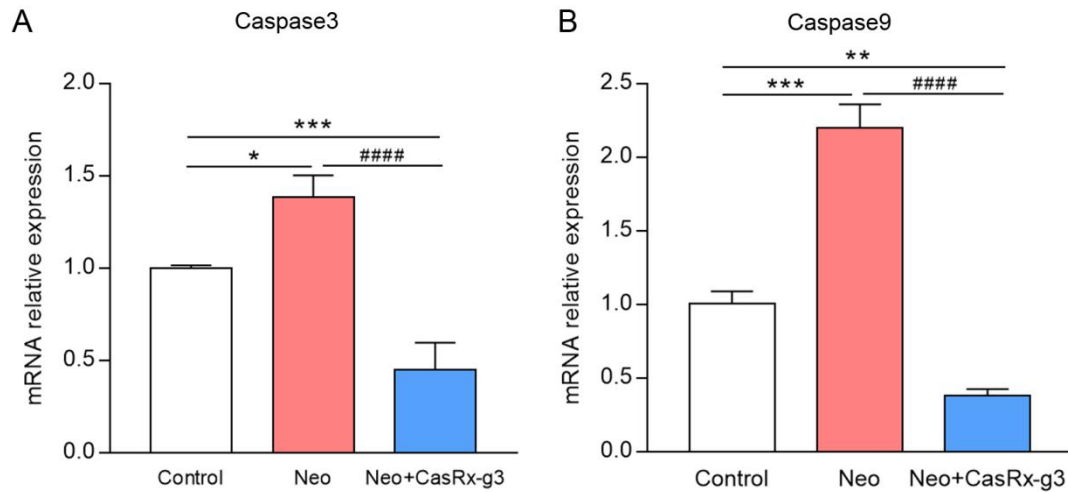

**Figure S3.** The expression of apoptosis-related genes in HEI-OC1 cells. The relative mRNA expression of *Caspase3* (A) and *Caspase9* (B) in HEI-OC1 cells. Three groups were shown in the graph including HEI-OC1 cells without any treatments (Control), the neomycin-treated group (Neo), and the neomycin+CasRx-g3-treated group (Neo+CasRx-g3). Each group had more than three biologically independent samples. Statistical analysis was performed by One-way ANOVA with Bonferroni's multiple comparisons test. All data were presented as the mean  $\pm$  SD. \*, \*\*,\*\*\*p < 0.05, 0.01, 0.001 vs control; #####p < 0.0001 vs Neo.

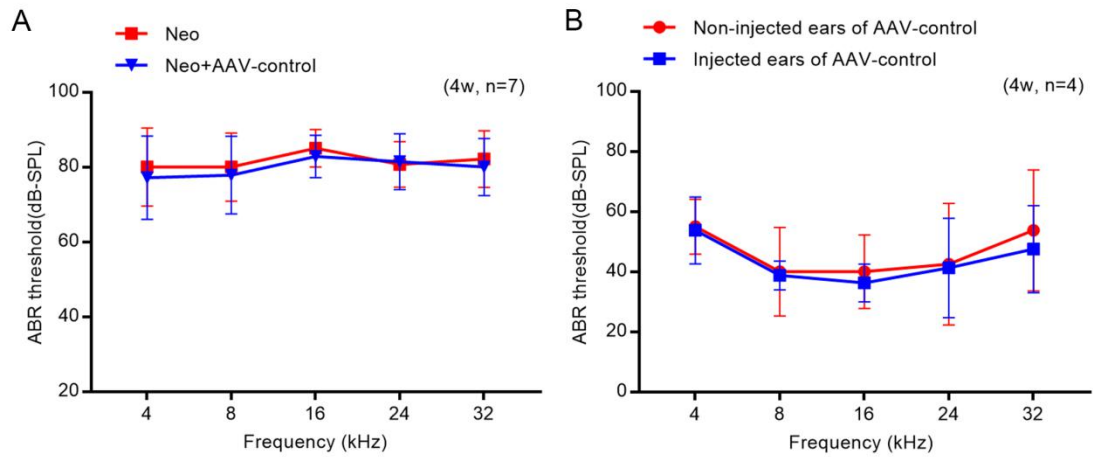

**Figure S4.** The ABR thresholds of both ears after AAV-control injection with or without neomycin exposure. (A) The ABR thresholds of the contralateral and ipsilateral ears were recorded after the treatment of AAV-control with neomycin exposure and were from 70 dB to 90 dB. (B) The ABR thresholds of the contralateral and ipsilateral ears were recorded after the treatment of AAV-control without neomycin exposure. The ABR thresholds were from 30 dB to 60 dB, and no significant differences were seen between the two sides.

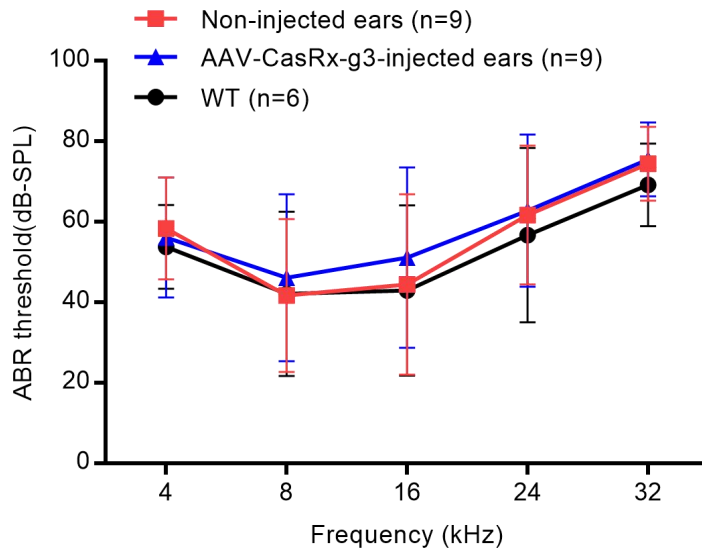

**Figure S5.** The ABR thresholds of 10-week mice. The ABR thresholds of the bilateral ears were recorded after the treatment of AAV-CasRx-g3 without neomycin exposure, which showed no significant difference with that of WT mice at all frequencies. All data were presented as the mean  $\pm$  SD.

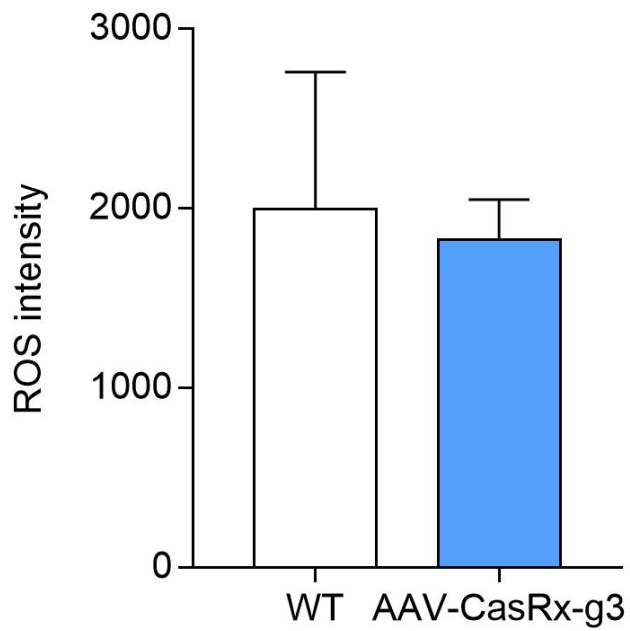

**Figure S6.** The ROS intensity in cochleae. The cochleae from 10-week mice were collected and prepared for ROS activity according to the ROS detection kit (Biolab Technology Co., Ltd. Beijing). The O12 probe was co-incubated with samples for 30 min, and the fluorescence in 530nm wavelength was examined. The ROS intensity was determined by the fluorescence per microgram protein. No significant difference in ROS intensity between WT and AAV-CasRx-injected mice. Each group had five biologically independent samples(n=5), data were presented as the mean  $\pm$  SD.

## Supplemental tables

**Table S1.** Guide sequences for *Htra2* mRNA targeting

| Targets | Sequences                            |
|---------|--------------------------------------|
| gRNA1   | 5' TCCCCACATTCAATCGTGCCCAGAGATCCG 3' |
| gRNA2   | 5' TGAAGTCCCCACATTCAATCGTGCCCAGAG 3' |
| gRNA3   | 5' CCCACATTCAATCGTGCCCAGAGATCCGGG 3' |
| gRNA4   | 5' CTTCCAGGGCTCCTGCGGGCCTCCTGGTCA 3' |
| gRNA5   | 5' GATCTCGATATAGACCACAGCAGGGGCTGT 3' |
| gRNA6   | 5' CCACTACGAATCCTGATCCGTTTGAGATGG 3' |
| gRNA7   | 5' TGGGCGTTGGTAACGATGAGCCCATCTGAA 3' |
| gRNA8   | 5' AGCTGTGACCATGGCCTCATAAGTATCCCC 3' |
| gRNA9   | 5' AATCCTCAGTGTGGCAATGTCTGCTACGGG 3' |
| gRNA10  | 5' GCAACAACAAACTCCCCTTGCCGGACATCA 3' |
| gRNA11  | 5' GGCTTCCCATGGCAACAACAAACTCCCCTT 3' |
| gRNA12  | 5' CATGGCAACAACAAACTCCCCTTGCCGGAC 3' |
| gRNA13  | 5' GGTTAACCAGGGGACCACCAGAATTTCCAA 3' |
| gRNA14  | 5' CCAGAATTTCCAAAATCAATAGCTGCATCG 3' |
| gRNA15  | 5' TTCCAAAATCAATAGCTGCATCGGTCTGAA 3' |
| gRNA16  | 5' AAGGCGATCAGAAGGGATGGCAAAGGAGAT 3' |
| gRNA17  | 5' AGTCAGGGTCAGCATCATCACTCCAATGTA 3' |
| gRNA18  | 5' ACCATGCTGAACATCAGGGAAGCTTGGCTC 3' |
| gRNA19  | 5' TGCGGGGGAGCCCAGGATAACTTTATGAAT 3' |
| gRNA20  | 5' TAACTTTATGAATGAGGACACCATGCTGAA 3' |
| gRNA21  | 5' GCCAAGATCACATCACCAGGCCGCAGACCA 3' |
| gRNA22  | 5' ATAAACATCTTCAGCATTTTGTGCCAATTT 3' |
| gRNA23  | 5' TAAGGTCAGTGTCTCTGATCCGCGCCGGAT 3' |

**Table S2.** DEGs between Neo and AAV-CasRx-g3 groups
